# Supplementary material
Source: PubMed Central journal article supplement (PMC3488453)
Supplement: NIHMS397833-supplement-supplement_1.pdf [file NIHMS397833-supplement-supplement_1.pdf]

## Supplement Material

**Supplementary Table I Cohort Studies of ABO Blood Type and Risk of CHD**

| <b>Citation (y)</b> | <b>Study</b>                                      | <b>Number of participants</b> | <b>Age (mean, y)</b> | <b>Follow-up (y)</b> | <b>Cases (n)</b> | <b>Adjustment for other variables</b> | <b>Outcome</b> | <b>ABO assessment</b>            |
|---------------------|---------------------------------------------------|-------------------------------|----------------------|----------------------|------------------|---------------------------------------|----------------|----------------------------------|
| Suadicani (2000)    | The Copenhagen Male Study (100% men)              | 2,993                         | 63                   | 8                    | 242              | No adjustment                         | IHD            | Standard agglutination technique |
| Whincup (1990)      | British regional heart study (100% men)           | 7,662                         | 50                   | 8                    | 481              | No adjustment                         | MI + fatal IHD | Standard agglutination technique |
| Garrison (1976)     | The Framingham Heart study (43% men)              | 3,837                         | 58                   | 10                   | 361              | No adjustment                         | CHD            | Serological test                 |
| Medalie (1971)      | Israeli Ischemic Heart Disease Project (100% men) | 9,472                         | 49                   | 5                    | 415              | Age-adjusted                          | MI             | Serological test                 |
| Meade (1994)        | Northwick Park Heart Study (100% men)             | 1,183                         | 52                   | 16                   | 172              | No adjustment                         | IHD            | Serological test                 |
| He (present study)  | Nurses' Health Study (0% men)                     | 62,073                        | 46                   | 26                   | 2,055            | Multivariate-adjustment               | MI+ fatal CHD  | Self-reported (validation)       |
| He (present study)  | Health Professionals Follow-up Study (100% men)   | 27,428                        | 53                   | 20                   | 2,015            | Multivariate-adjustment               | MI+ fatal CHD  | Self-reported (validation)       |

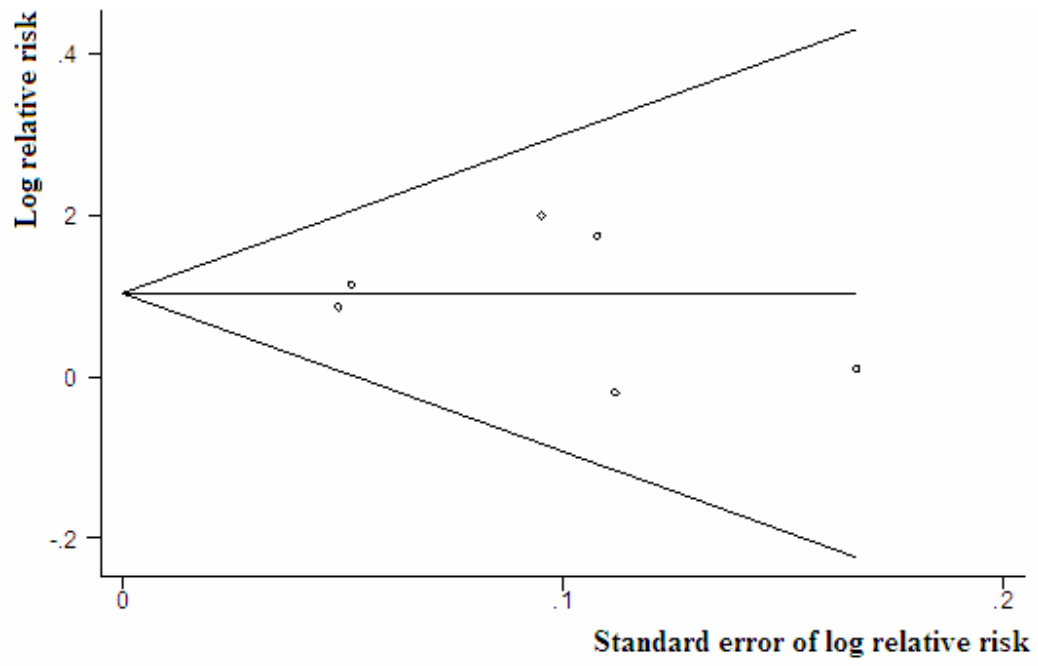

Supplementary Figure I Begg's funnel plot

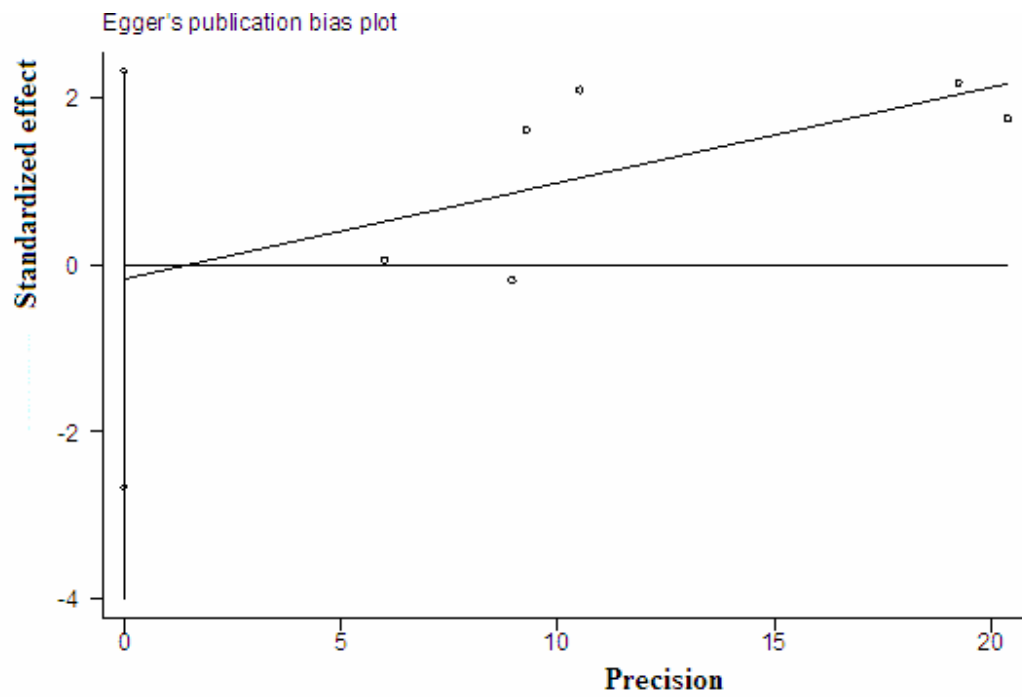

**Supplementary Figure II Plot of publication bias using data from Egger et al's regression asymmetry test**
